# Supplementary material for: Over-optimism in unsupervised microbiome analysis: Insights from network learning and clustering
Source: PubMed Central journal article supplement (PMC9873197; doi:10.1371/journal.pcbi.1010820), 2023-01-06
Supplement: pcbi.1010820.s003.pdf [file pcbi.1010820.s003.pdf]

# S3: Full results and plots for research task 3 (differential network analysis)

## List of Figures

- A Results for differential network analysis on the discovery data,  $n = 100$  . . . 2
- B Results for differential network analysis on the discovery data,  $n = 250$  . . . 3
- C Results for differential network analysis on the discovery data,  $n = 500$  . . . 4
- D Largest GCDs for the differential network analysis on the discovery data, compared with the results on validation data,  $n = 100$  . . . . . 5
- E Largest GCDs for the differential network analysis on the discovery data, compared with the results on validation data,  $n = 250$  . . . . . 5
- F Largest GCDs for the differential network analysis on the discovery data, compared with the results on validation data,  $n = 500$  . . . . . 6

Fig A-C show the results of the differential network analysis on the discovery data over 50 samplings. Boxplots summarize the GCDs between the microbial network based on the non-antibiotics samples vs. the network based on the antibiotics samples. GCDs that were picked as the “best” results are marked by red squares.

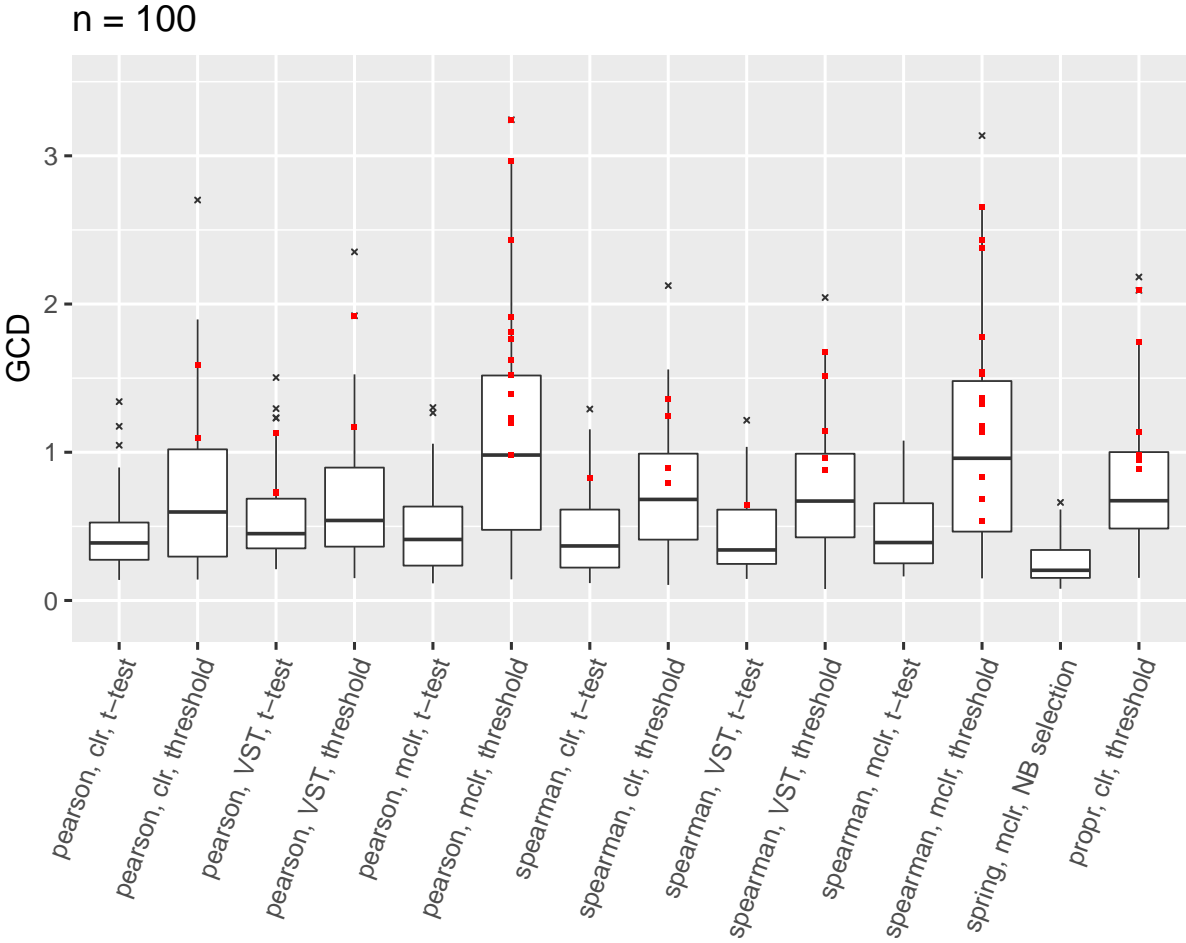

**Fig A.** Results for differential network analysis on the discovery data,  $n = 100$



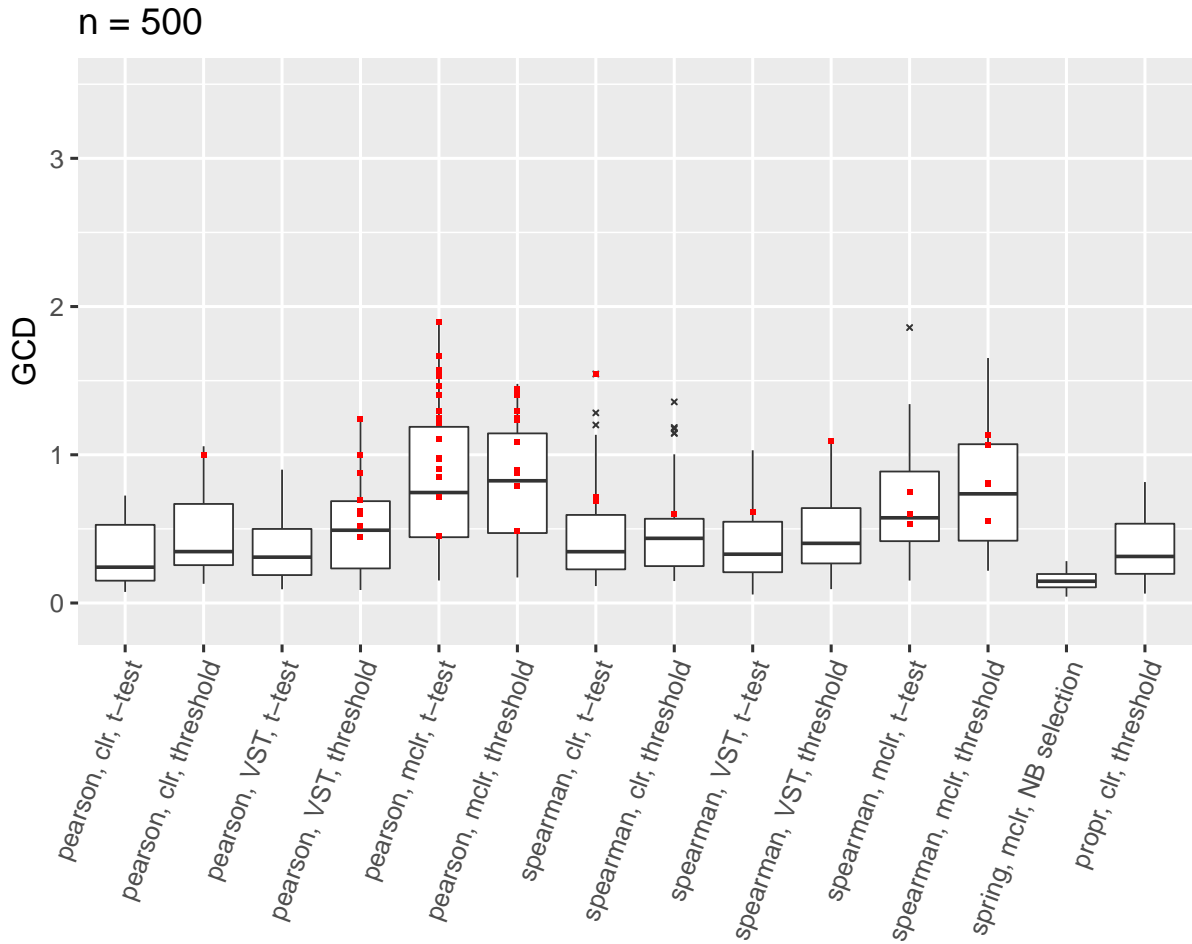

**Fig C.** Results for differential network analysis on the discovery data,  $n = 500$

Similar to hub detection, there is no superior method combination that always leads to best results, i.e., highest GCD values. Notably, sparsification via  $t$ -test never leads to best results for  $n = 100$  and  $n = 250$ , but only for  $n = 500$ . However, a general trend cannot be confirmed due to the limited sample size in this research task.

Fig D-F show the results of applying the best method combinations to the validation data and compare these to the results on the discovery data. Over-optimism is indicated by downward lines, which is the case in about 75% of the 50 samplings.

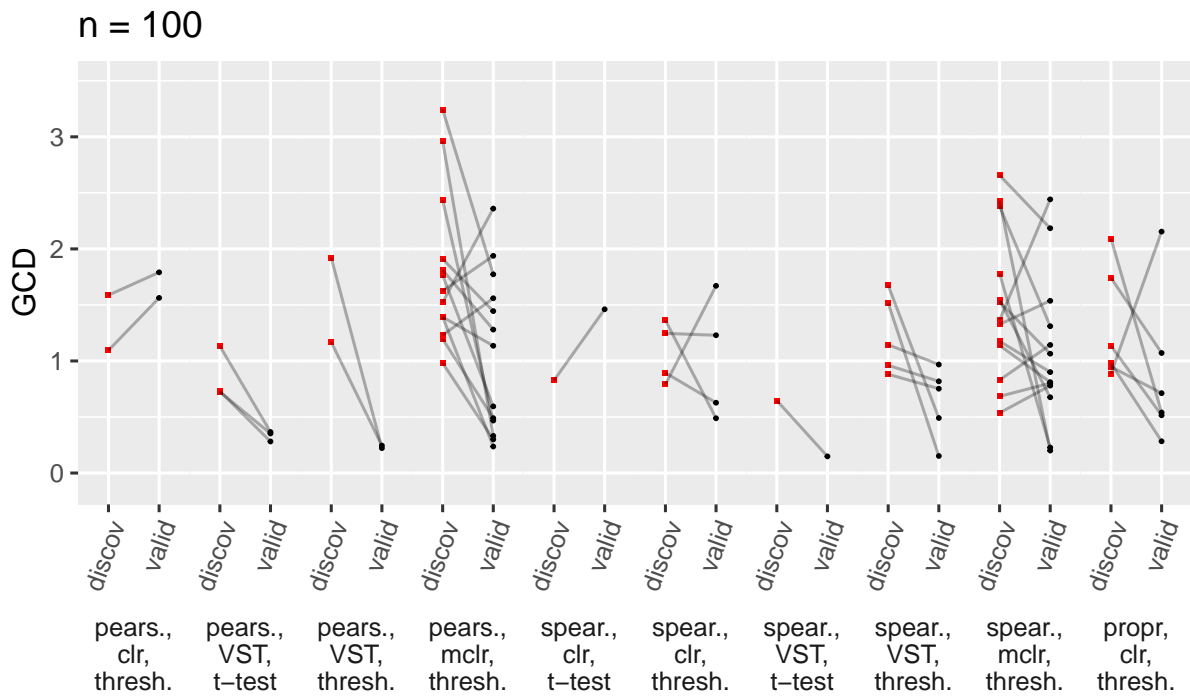

**Fig D.** Largest GCDs for the differential network analysis on the discovery data, compared with the results on validation data,  $n = 100$

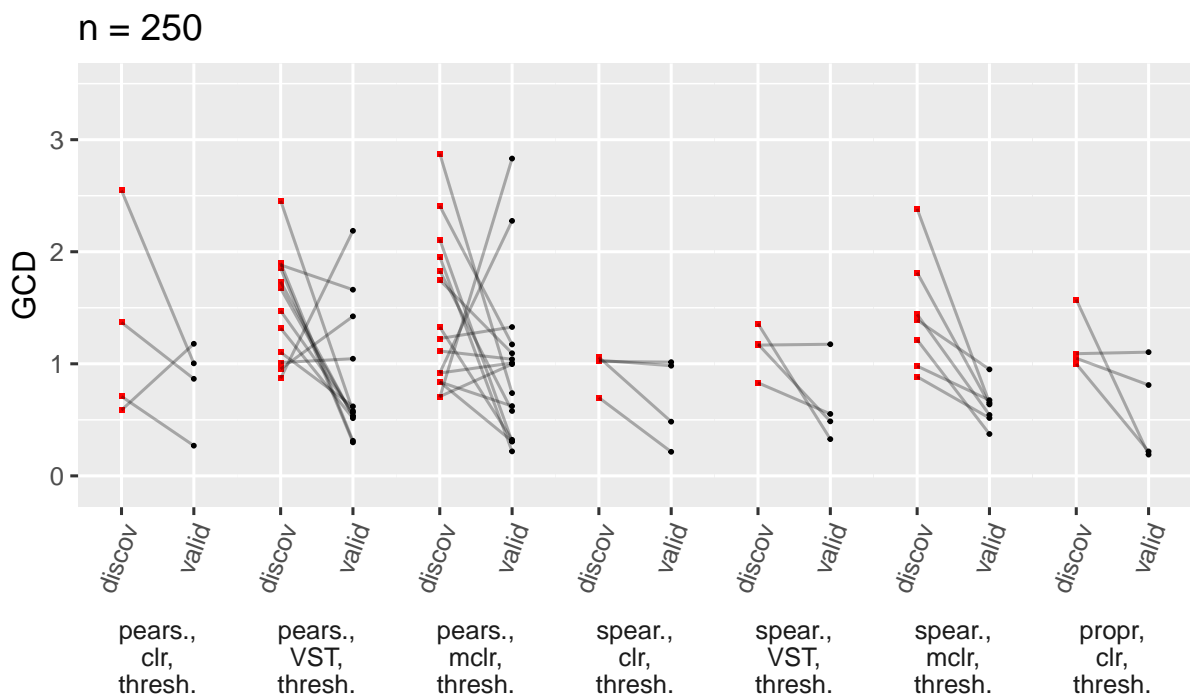

**Fig E.** Largest GCDs for the differential network analysis on the discovery data, compared with the results on validation data,  $n = 250$

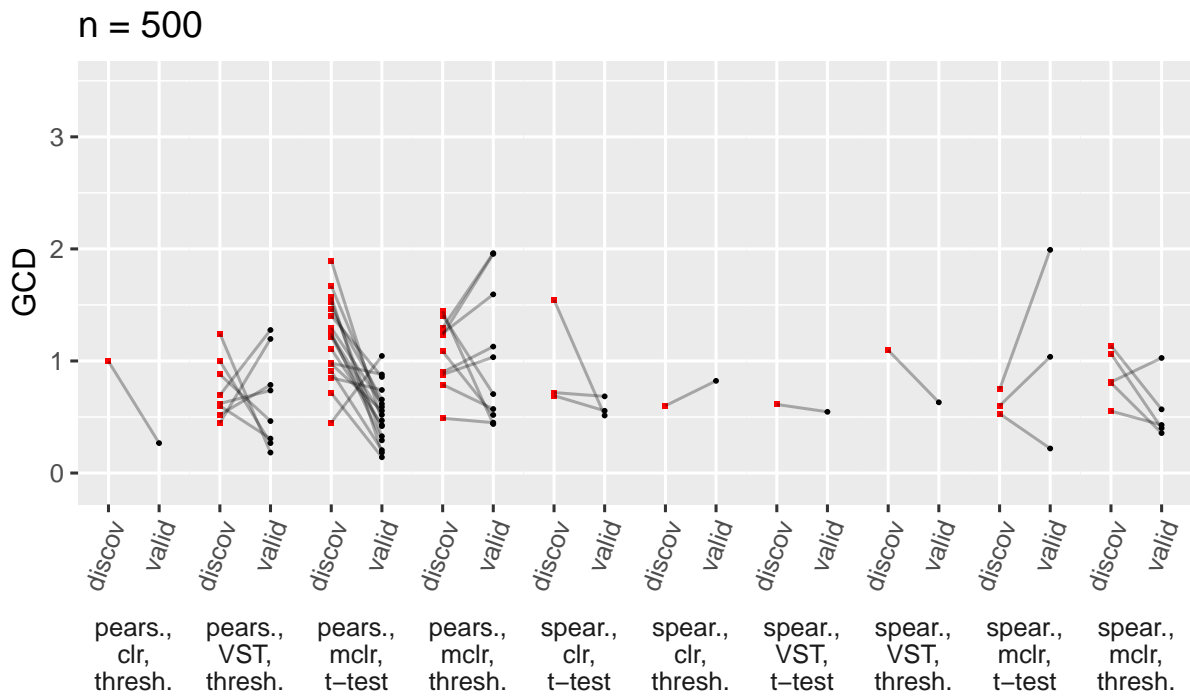

**Fig F.** Largest GCDs for the differential network analysis on the discovery data, compared with the results on validation data,  $n = 500$
